# Supplementary material for: Astrocytic Ca2+ signals are required for the functional integrity of tripartite synapses
Source: PubMed Central journal article supplement (PMC3563617; doi:10.1186/1756-6606-6-6), 2013-01-28

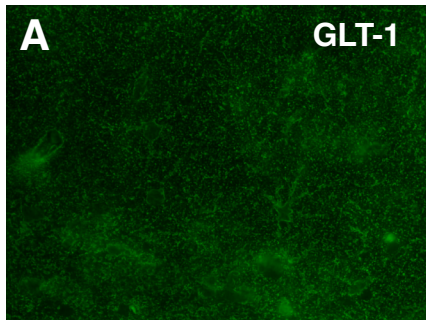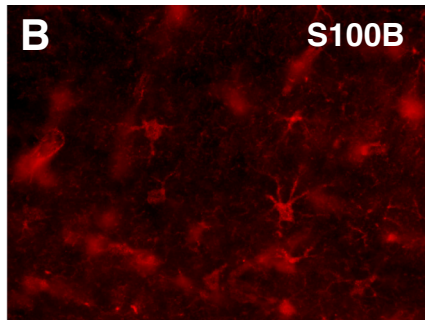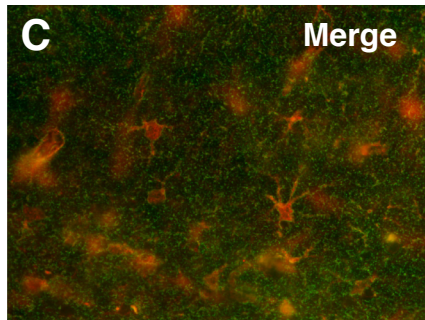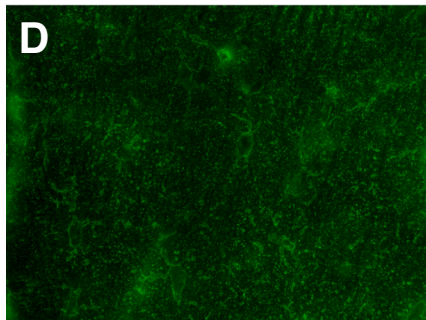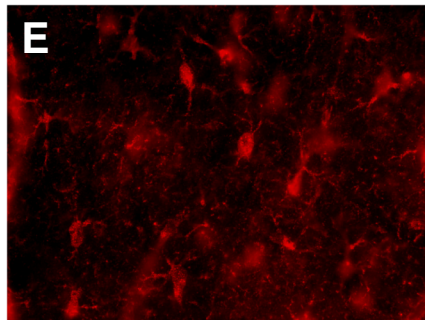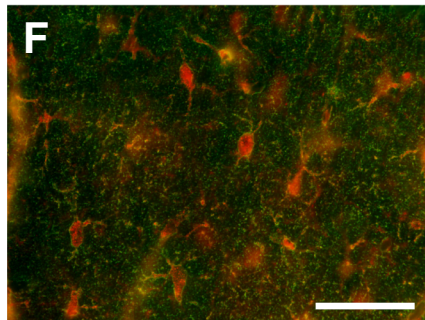

Supplement: 1756-6606-6-6-S6.pdf [file 1756-6606-6-6-S6.pdf]
